# Supplementary material for: LYVE-1–expressing Macrophages Modulate the Hyaluronan-containing Extracellular Matrix in the Mammary Stroma and Contribute to Mammary Tumor Growth
Source: PubMed Central journal article supplement (PMC11141485; doi:10.1158/2767-9764.crc-24-0205), 2024-05-31
Supplement: crc-24-0205-s05.pdf [file crc-24-0205-s05.pdf]

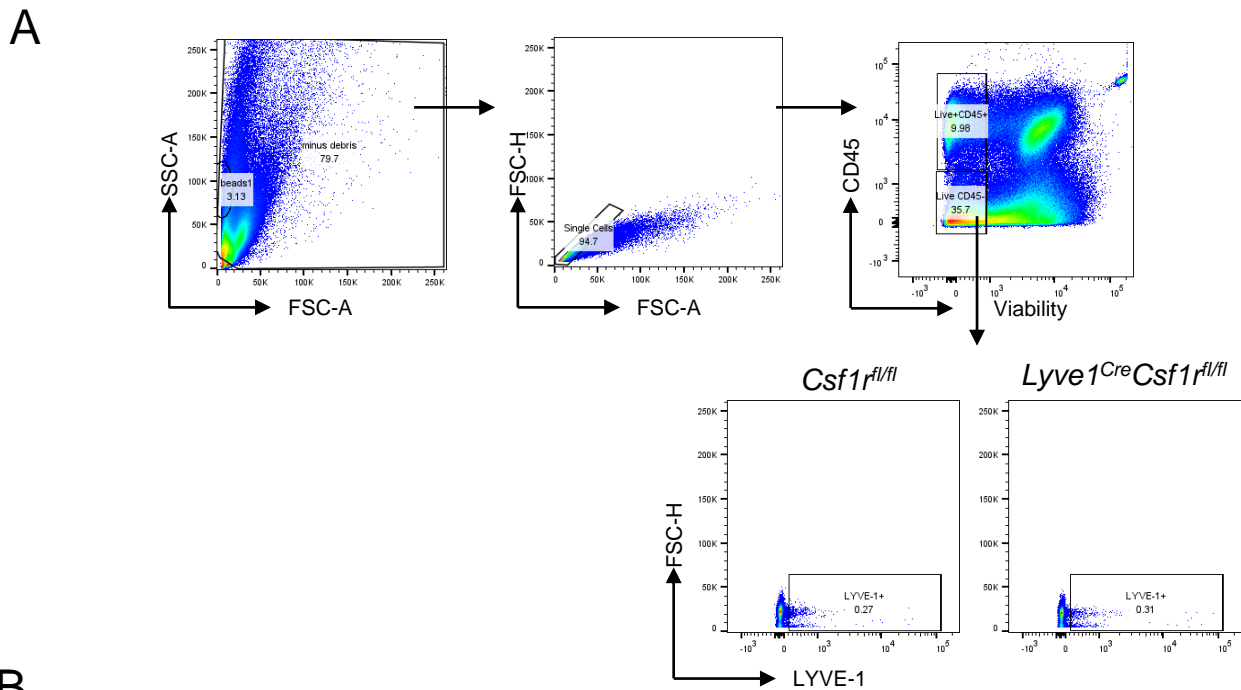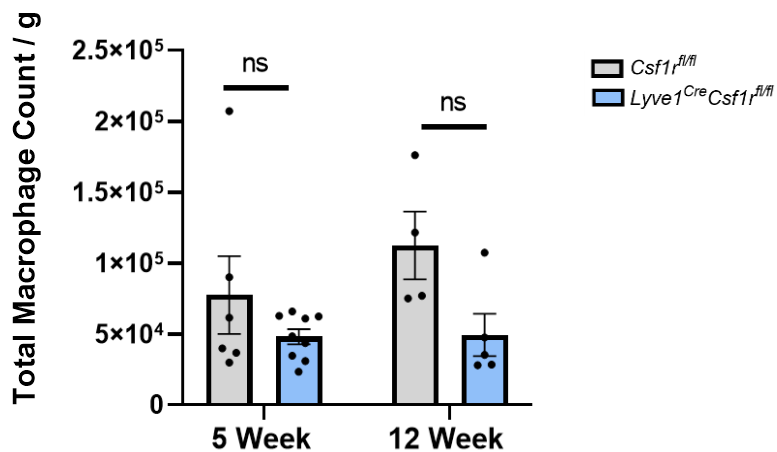

**Figure S1**

**Representative flow cytometry gating and macrophage counts**

(A) Representative flow cytometry gating for CD45-LYVE-1<sup>+</sup> LECs. (B) Total CD45<sup>+</sup>F4/80<sup>+</sup>CD11b<sup>+</sup> macrophage count normalized to mammary gland weight from 5-week and 12-week female *Csf1r<sup>fl/fl</sup>* (grey) and *Lyve1<sup>Cre</sup>Csf1r<sup>fl/fl</sup>* (blue) mice. Each dot represents one mouse.
