# Supplementary material for: LYVE-1–expressing Macrophages Modulate the Hyaluronan-containing Extracellular Matrix in the Mammary Stroma and Contribute to Mammary Tumor Growth
Source: PubMed Central journal article supplement (PMC11141485; doi:10.1158/2767-9764.crc-24-0205), 2024-05-31
Supplement: crc-24-0205-s06.pdf [file crc-24-0205-s06.pdf]

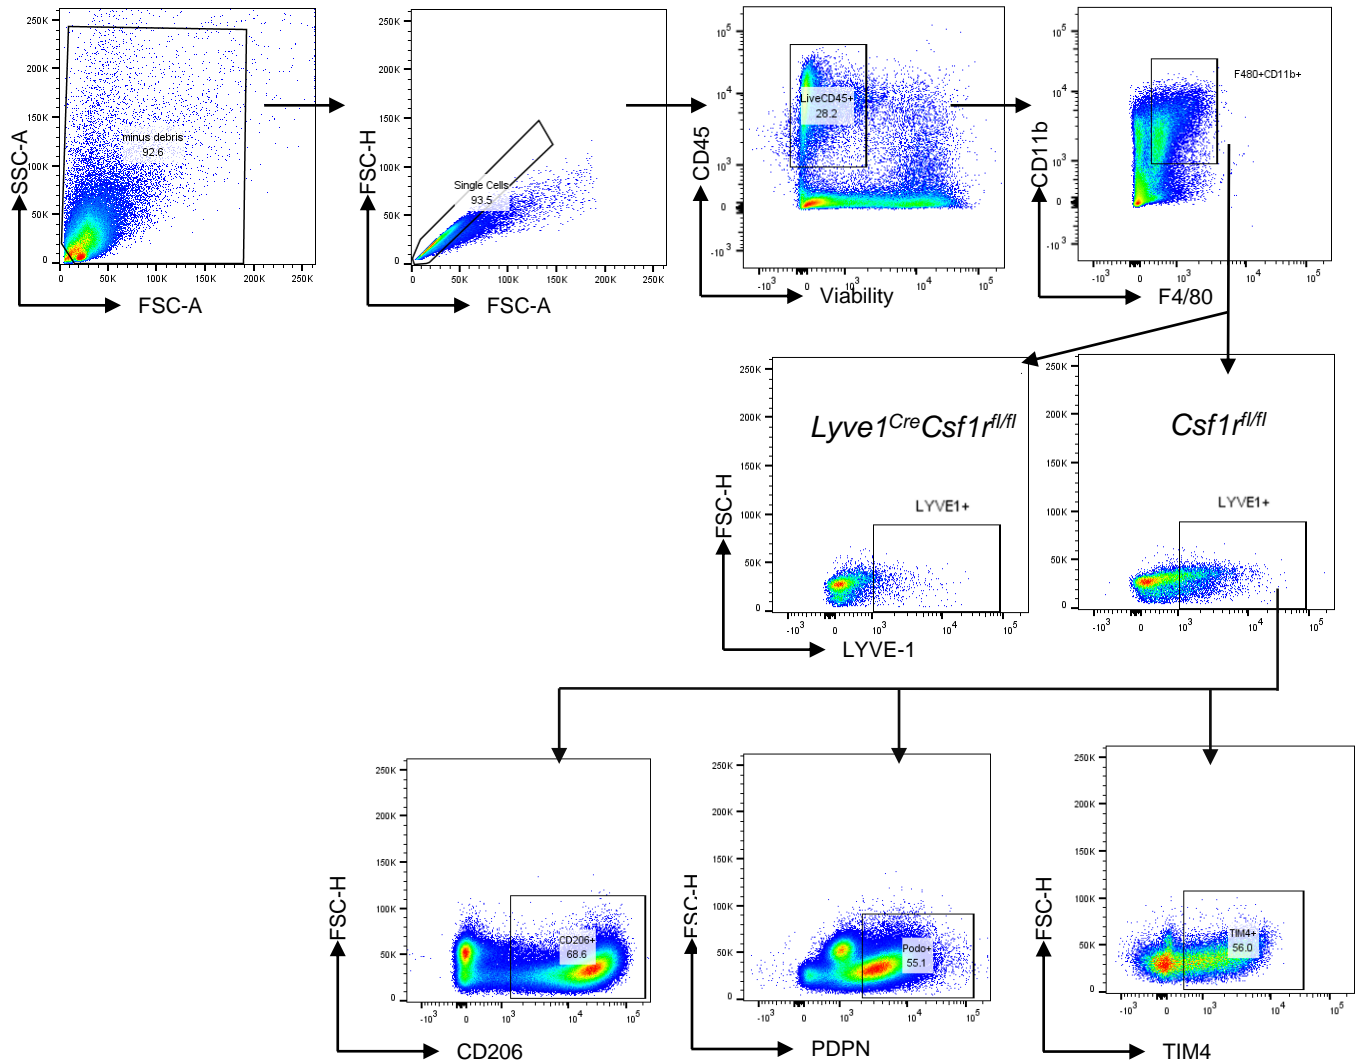

**Figure S2**

**Representative mammary gland flow cytometry gating**

Representative flow cytometry gating for CD45<sup>+</sup>F4/80<sup>+</sup>CD11b<sup>+</sup>LYVE-1<sup>+</sup> macrophages coexpressing CD206, PDPN, and TIM4 in mammary glands from 5-week *Csf1<sup>fl/fl</sup>* and *Lyve1<sup>Cre</sup>Csf1<sup>fl/fl</sup>* mice.
