# Supplementary material for: LYVE-1–expressing Macrophages Modulate the Hyaluronan-containing Extracellular Matrix in the Mammary Stroma and Contribute to Mammary Tumor Growth
Source: PubMed Central journal article supplement (PMC11141485; doi:10.1158/2767-9764.crc-24-0205), 2024-05-31
Supplement: crc-24-0205-s09.pdf [file crc-24-0205-s09.pdf]

A

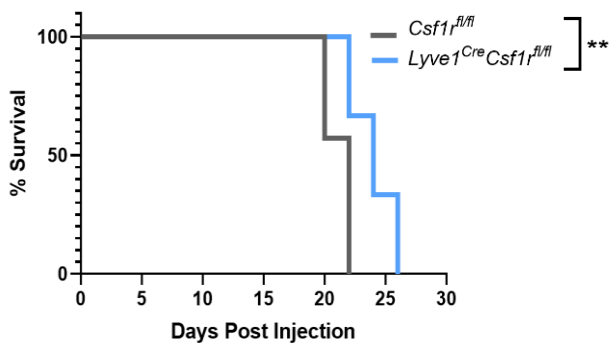

B

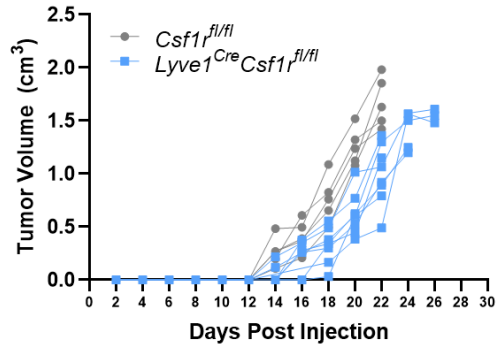

C

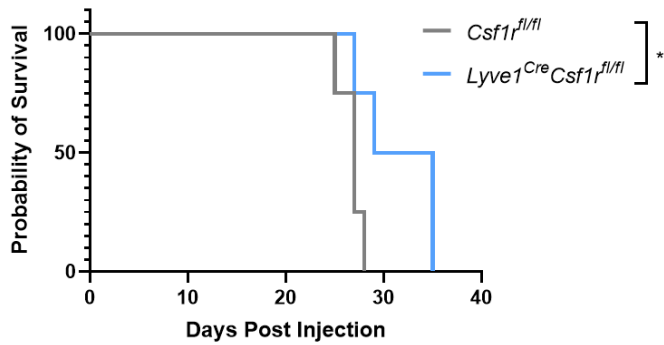

D

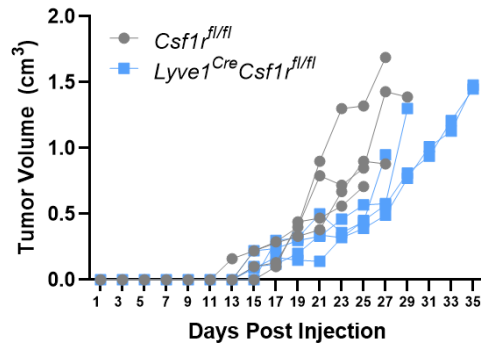

E

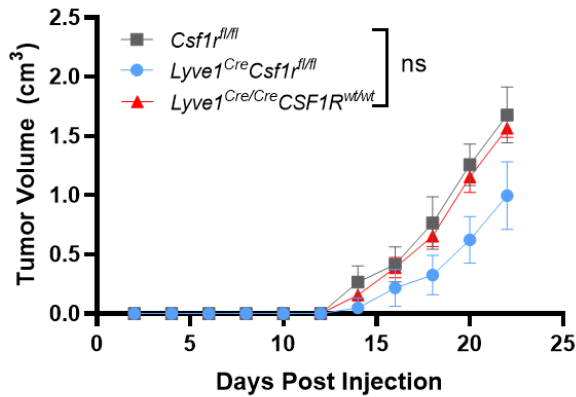

Figure S5

### Tumor growth curve

(A) Kaplan-Meier plot and (B) growth curve through end point for EO771 tumors in *Csf1r<sup>fl/fl</sup>* (grey, n=4) *Lyve1<sup>Cre</sup>Csf1r<sup>fl/fl</sup>* (blue, n=4). (C) Kaplan-Meier plot and (D) growth curve through end point for WNT-4226 tumors in *Csf1r<sup>fl/fl</sup>* (grey, n=4) *Lyve1<sup>Cre</sup>Csf1r<sup>fl/fl</sup>* (blue, n=4). (E) EO771 tumor growth in *Csf1r<sup>fl/fl</sup>* (grey, n=4) *Lyve1<sup>Cre</sup>Csf1r<sup>fl/fl</sup>* (blue, n=4) and *Lyve1<sup>Cre/Cre</sup>Csf1r<sup>wt/wt</sup>* (red, n=3) mice.
