# Supplementary material for: LYVE-1–expressing Macrophages Modulate the Hyaluronan-containing Extracellular Matrix in the Mammary Stroma and Contribute to Mammary Tumor Growth
Source: PubMed Central journal article supplement (PMC11141485; doi:10.1158/2767-9764.crc-24-0205), 2024-05-31
Supplement: crc-24-0205-s10.pdf [file crc-24-0205-s10.pdf]

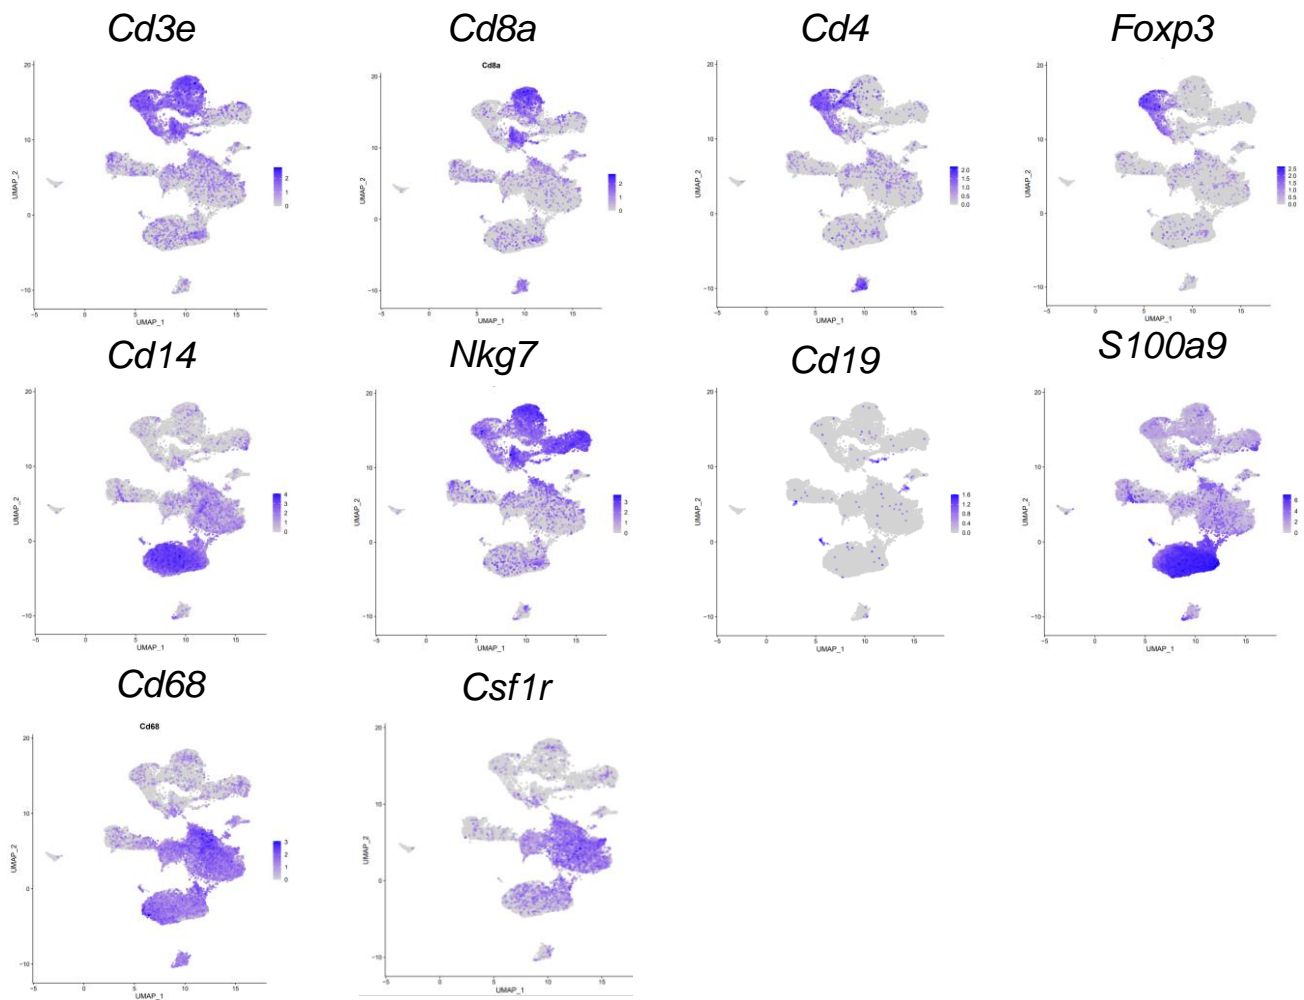

**Figure S6**

**scRNA-seq Immune Cell Feature Plots.**

Feature plots of immune cell markers *Cd3e*, *Cd8a*, *Cd4*, *Foxp3*, *Cd14*, *Nkg7*, *Cd19*, and *S100a9* from EO771 tumors from *Csf1<sup>fl/fl</sup>* mice.
