# Supplementary material for: LYVE-1–expressing Macrophages Modulate the Hyaluronan-containing Extracellular Matrix in the Mammary Stroma and Contribute to Mammary Tumor Growth
Source: PubMed Central journal article supplement (PMC11141485; doi:10.1158/2767-9764.crc-24-0205), 2024-05-31
Supplement: crc-24-0205-s11.pdf [file crc-24-0205-s11.pdf]

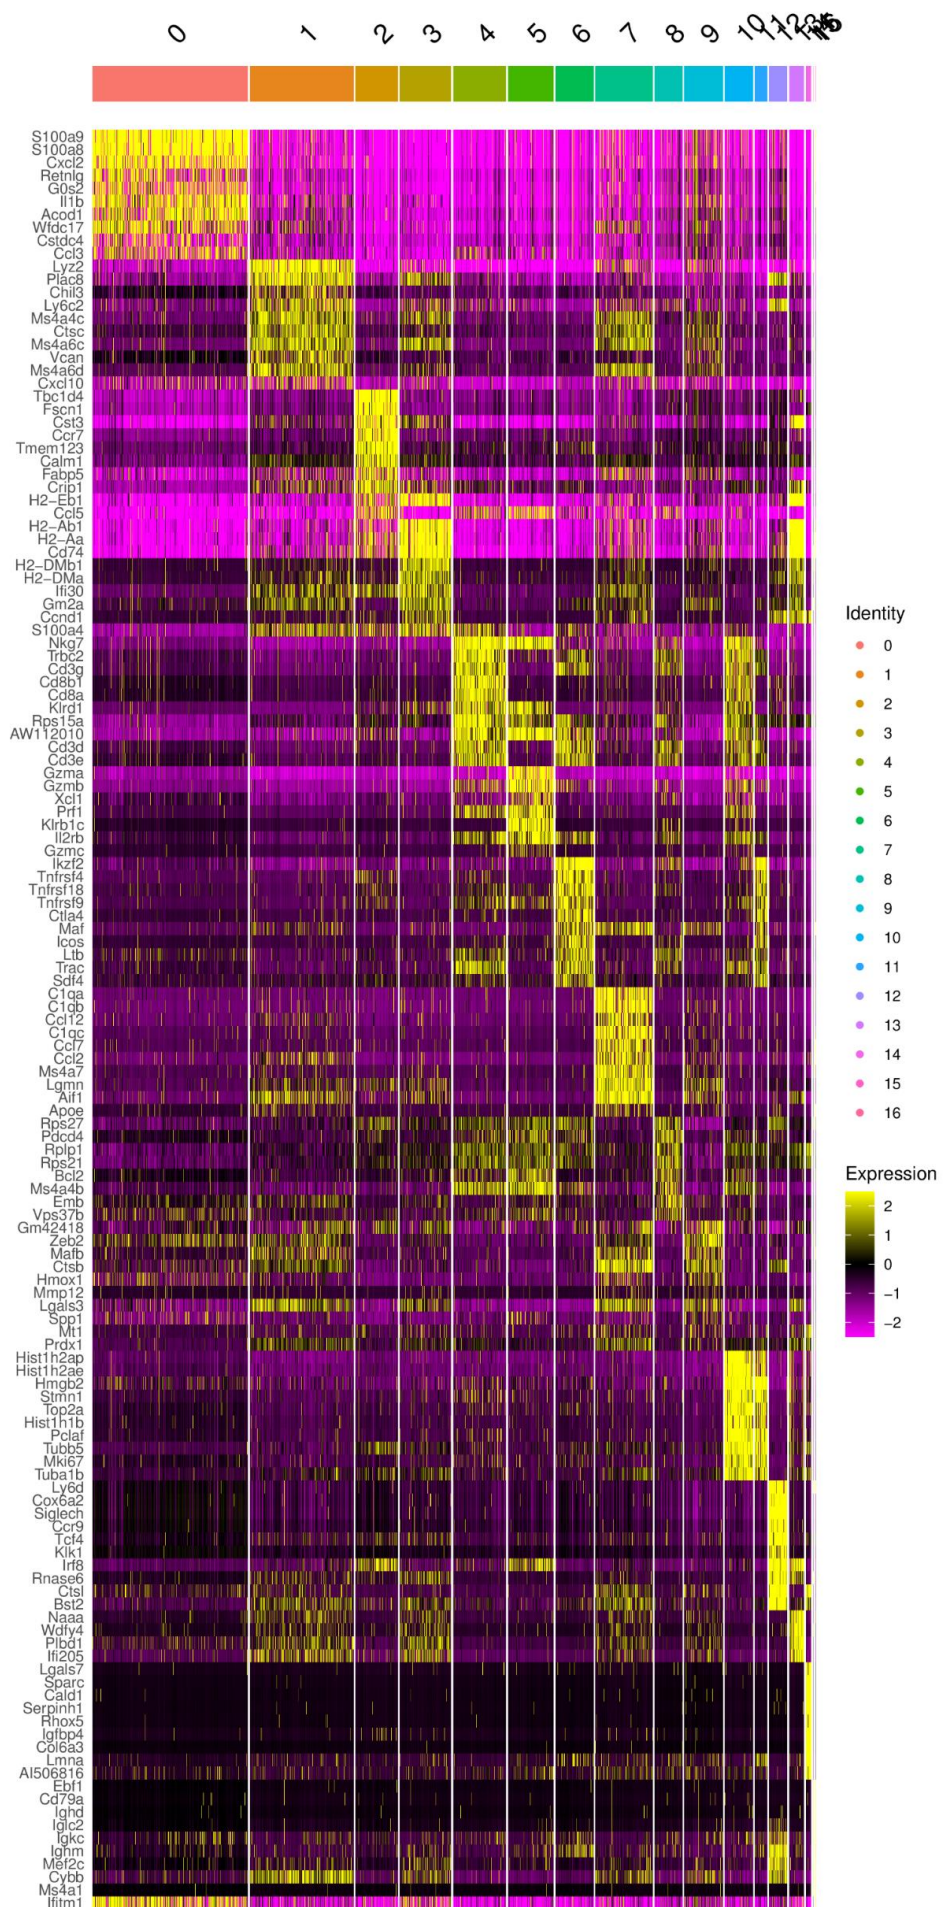

**Figure S7**

**scRNA-seq heatmap of top 10 genes per cluster.**

Heatmap of top 10 genes per cluster from EO771 tumors grown in *Csf1<sup>fl/fl</sup>* mice.
