# Supplementary material for: LYVE-1–expressing Macrophages Modulate the Hyaluronan-containing Extracellular Matrix in the Mammary Stroma and Contribute to Mammary Tumor Growth
Source: PubMed Central journal article supplement (PMC11141485; doi:10.1158/2767-9764.crc-24-0205), 2024-05-31
Supplement: crc-24-0205-s12.pdf [file crc-24-0205-s12.pdf]

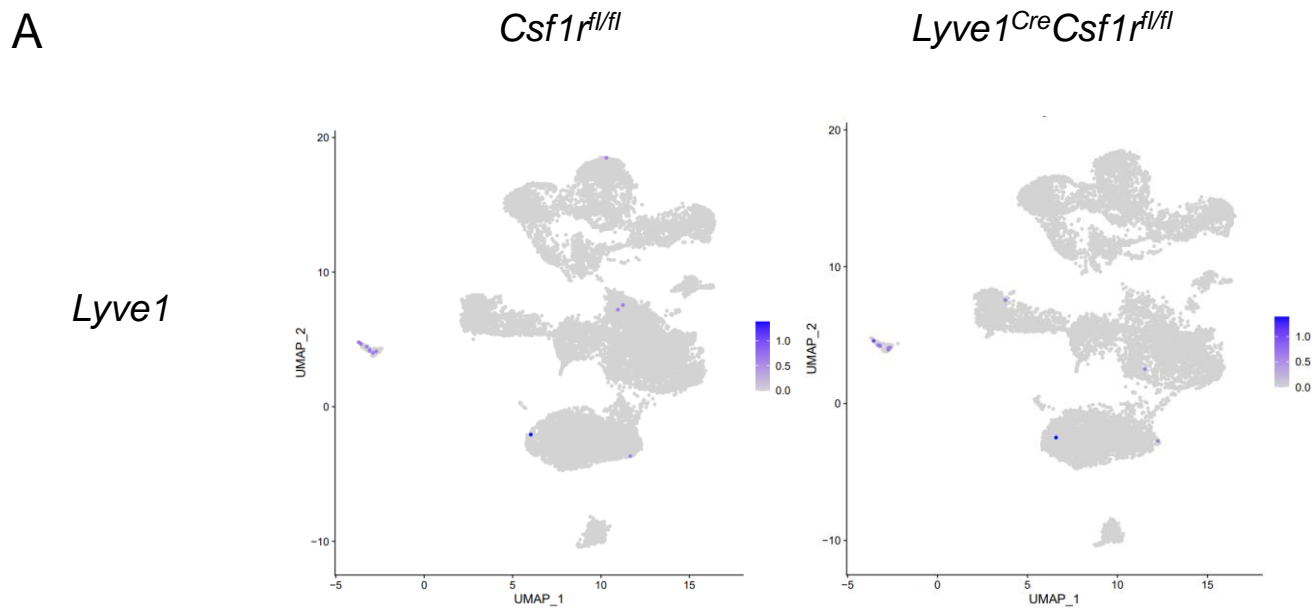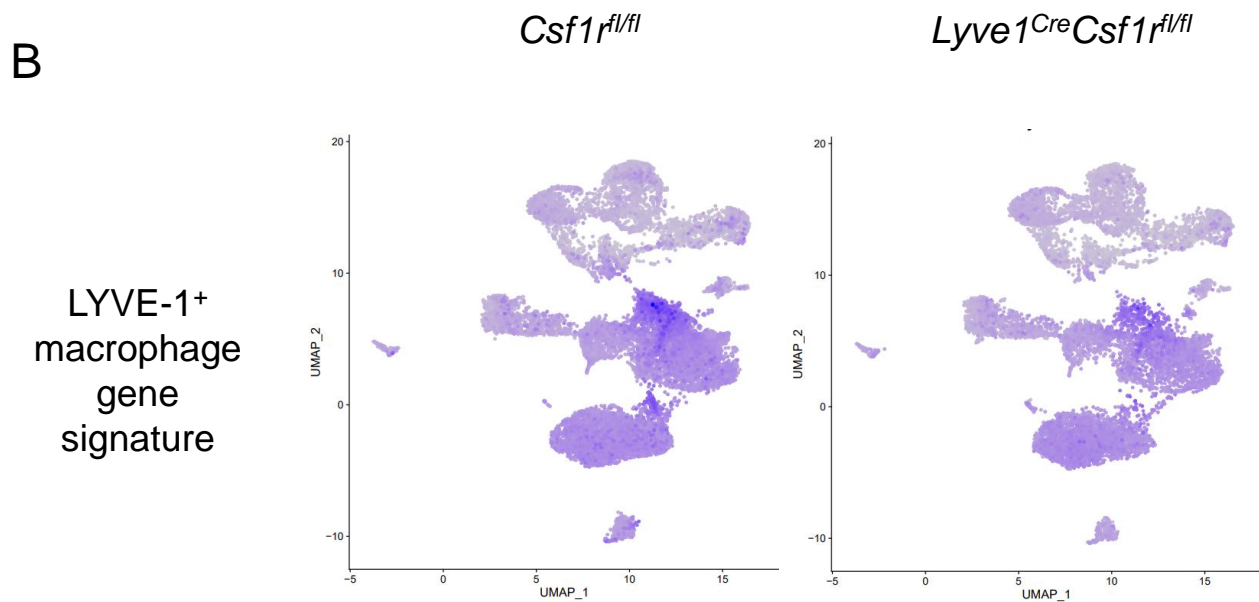

**Figure S8**

**LYVE-1<sup>+</sup> macrophage gene signature feature plots.**

(A) Feature plot of *Lyve1* in *Csf1<sup>fl/fl</sup>* and *Lyve1<sup>Cre</sup>Csf1<sup>fl/fl</sup>* samples. (B) Feature plot of LYVE-1<sup>+</sup> macrophage gene signature from *Csf1<sup>fl/fl</sup>* and *Lyve1<sup>Cre</sup>Csf1<sup>fl/fl</sup>* samples.
